# Supplementary material for: Long COVID Prevalence and the Impact of the Third SARS-CoV-2 Vaccine Dose: A Cross-Sectional Analysis from the Third Follow-Up of the Borriana Cohort, Valencia, Spain (2020–2022)
Source: MDPI journal article supplement (doi:10.3390/vaccines11101590), 2023-10-12
Supplement: s1 [file s1]

## Supplementary materials

### Laboratory methods

We first performed a serosurvey and an epidemiological questionnaire survey in June 2020, which has been described by Domenech-Montoliu and co-authors (1). A second serosurvey and questionnaire were conducted in October 2020. In summary, the serosurveys included determinations of anti-SARS-CoV-2 N-antibodies in June and October 2020 with a flow chart of the study, and ABO blood groups and vitamin D status were determined in October 2020. The serosurvey results were the subject of two previous publications and are not further discussed in the current manuscript (1, 2).

### Supplement Cellular Immunity, methods

Two sets of 15-mer overlapping peptides (11-mer overlap) encompassing the ancestral Wuhan-Hu-1 SARS-CoV-2 Spike (S) glycoprotein (S1, 158 peptides and S2, 157 peptides) and in parallel with a pool of 315 (158+157) peptides derived from a peptide scan (15 mers with 11 aa overlap, including a few 13–17 mers) through Spike glycoprotein, containing mutations T19I, L24-, P25-, P26-, A27S, G142D, V213G, G339D, S371F, S373P, S375F, T376A, D405N, R408S, K417N, N440K, S477N, T478K, E484A, Q493R, Q498R, N501Y, Y505H, D614G, H655Y, N679K, P681H, N764K, D796Y, Q954H, N969K of SARS-CoV-2 (Severe Acute Respiratory Syndrome-Related Coronavirus 2)—(Lineage B.1.1.529 / BA.2 Omicron sub-variant), both at a concentration of 1 µg/ml per peptide (JPT Peptide Technologies GmbH; Berlin, Germany), in the presence of 1 µg/ml of costimulatory monoclonal antibodies (mAbs) to CD28 and CD49d, were used for 6 h stimulation (BD Biosciences). Appropriate positive (phytohemagglutinin) and negative controls were used. Samples mock-stimulated with phosphate-buffered saline (PBS)/dimethyl sulfoxide and costimulatory antibodies were run in parallel. Brefeldin A (10 µg/ml) was added for the last 4 h of incubation. Blood was then lysed (BD FACS lysing solution) and frozen at –80 °C until tested. On the day of testing, stimulated blood was thawed at 37 °C, washed, permeabilized (BD permeabilizing solution), and stained with a combination of labeled mAbs (anti-IFNγ-FITC, anti-CD4-APC-H7, anti-CD8-PerCP-Cy5.5, and anti-CD3-APC) for 1 h at room temperature (Table antibodies). Cells were then washed, resuspended in 200 µL of 1% paraformaldehyde in PBS, and analyzed within 2 h on an FACSCanto flow

cytometer (BD Biosciences Immunocytometry Systems, San Jose, CA). CD3<sup>+</sup>/CD8<sup>+</sup> or CD3<sup>+</sup>/CD4<sup>+</sup> events were gated and then analyzed for IFN- $\gamma$  production. The data are expressed as the number of SARS-CoV-2-reactive IFN- $\gamma$ -producing CD4<sup>+</sup> or CD8<sup>+</sup> T cells relative to the absolute number of CD4<sup>+</sup> and CD8<sup>+</sup> T cells, respectively, x100 (%). Any frequency value of SARS-CoV-2-reactive IFN- $\gamma$ -producing CD4<sup>+</sup> or CD8<sup>+</sup> T cells after background subtraction was considered as a positive (detectable) result and used for analysis purposes (3).

## References

1. Domenech-Montoliu S, Pac-Sa MR, Vidal-Utrillas P, Latorre-Poveda M, Del Rio-Gonzalez A, Ferrando-Rubert S, et al. "Mass gathering events and COVID-19 transmission in Borriana (Spain): A retrospective cohort study". PLoS One. 2021;16(8):e0256747.
2. Domènech-Montoliu S, Puig-Barberà J, Pac-Sa MR, Vidal-Utrillas P, Latorre-Poveda M, Del Rio-González A, et al. Persistence of Anti-SARS-CoV-2 Antibodies Six Months after Infection in an Outbreak with Five Hundred COVID-19 Cases in Borriana (Spain): A Prospective Cohort Study. Covid. 2021;1(1):71-82.
3. Tormo N, Gimenez E, Martinez-Navarro M, Albert E, Navalpotro D, Torres I, et al. Performance comparison of a flow cytometry immunoassay for intracellular cytokine staining and the QuantiFERON(R) SARS-CoV-2 test for detection and quantification of SARS-CoV-2-Spike-reactive-IFN-gamma-producing T cells after COVID-19 vaccination. Eur J Clin Microbiol Infect Dis. 2022;41(4):657-62.

Supplemental Table S1. Comparison of the characteristics of COVID-19 episodes by immunization status:  
analysis of primed individuals (with prior COVID-19 infection, having received one, or two doses) versus those who received a third  
booster dose.

|                                               | Third dose vs none or one or two previous doses |                         |              | p-value |
|-----------------------------------------------|-------------------------------------------------|-------------------------|--------------|---------|
|                                               | Primed<br>154                                   | Boosted 3rd dose<br>319 | Total<br>473 |         |
| Covid Hx none, one episode and reinfection    |                                                 |                         |              |         |
| One episode                                   | 100 (64.9%)                                     | 253 (79.3%)             | 353 (74.6%)  | <0.001  |
| Reinfected                                    | 54 (35.1%)                                      | 66 (20.7%)              | 120 (25.4%)  |         |
| First episode                                 |                                                 |                         |              |         |
| Asymptomatic                                  | 27 (17.6%)                                      | 78 (24.5%)              | 105 (22.3%)  | 0.093   |
| Symptomatic                                   | 126 (82.4%)                                     | 240 (75.5%)             | 366 (77.7%)  |         |
| 1st Covid episode duration in days            | 9.91 (18.54)                                    | 8.08 (13.70)            | 8.66 (15.40) | 0.245   |
| 1st episode lab test                          |                                                 |                         |              |         |
| No                                            | 22 (14.3%)                                      | 43 (13.5%)              | 65 (13.7%)   | 0.811   |
| Yes                                           | 132 (85.7%)                                     | 276 (86.5%)             | 408 (86.3%)  |         |
| Outpatient consultation 1st episode           |                                                 |                         |              |         |
| No                                            | 70 (46.4%)                                      | 186 (58.3%)             | 256 (54.5%)  | 0.015   |
| Yes                                           | 81 (53.6%)                                      | 133 (41.7%)             | 214 (45.5%)  |         |
| Admission                                     |                                                 |                         |              |         |
| No                                            | 145 (95.4%)                                     | 310 (97.5%)             | 455 (96.8%)  | 0.228   |
| Yes                                           | 7 (4.6%)                                        | 8 (2.5%)                | 15 (3.2%)    |         |
| Second episode                                |                                                 |                         |              |         |
| Asymptomatic                                  | 9 (16.7%)                                       | 14 (21.5%)              | 23 (19.3%)   | 0.503   |
| Symptomatic                                   | 45 (83.3%)                                      | 51 (78.5%)              | 96 (80.7%)   |         |
| 2n episode lab test                           |                                                 |                         |              |         |
| No                                            | 3 (5.6%)                                        | 10 (15.2%)              | 13 (10.8%)   | 0.092   |
| Yes                                           | 51 (94.4%)                                      | 56 (84.8%)              | 107 (89.2%)  |         |
| 2nd COVID episode duration in days            | 4.40 (4.48)                                     | 4.22 (3.77)             | 4.30 (4.09)  | 0.814   |
| Outpatient consultation for COVID reinfection |                                                 |                         |              |         |
| No                                            | 28 (51.9%)                                      | 35 (53.8%)              | 63 (52.9%)   | 0.828   |
| Yes                                           | 26 (48.1%)                                      | 30 (46.2%)              | 56 (47.1%)   |         |
| Admission, reinfection episode                |                                                 |                         |              |         |
| No                                            | 54 (100.0%)                                     | 64 (98.5%)              | 118 (99.2%)  | 0.360   |
| Yes                                           | 0 (0.0%)                                        | 1 (1.5%)                | 1 (0.8%)     |         |
| Sequelae                                      |                                                 |                         |              |         |
| No                                            | 97 (63.0%)                                      | 231 (72.4%)             | 328 (69.3%)  | 0.037   |
| Yes                                           | 57 (37.0%)                                      | 88 (27.6%)              | 145 (30.7%)  |         |
| Fully recovered after covid                   |                                                 |                         |              |         |
| No                                            | 42 (27.3%)                                      | 63 (19.7%)              | 105 (22.2%)  | 0.065   |
| Yes                                           | 112 (72.7%)                                     | 256 (80.3%)             | 368 (77.8%)  |         |
| Perceived Current Health Status               |                                                 |                         |              |         |
| Poor                                          | 5 (3.3%)                                        | 6 (1.9%)                | 11 (2.3%)    | 0.479   |
| Fair                                          | 27 (17.6%)                                      | 47 (14.8%)              | 74 (15.7%)   |         |
| Good                                          | 90 (58.8%)                                      | 208 (65.6%)             | 298 (63.4%)  |         |
| Excellent                                     | 31 (20.3%)                                      | 56 (17.7%)              | 87 (18.5%)   |         |
| As healthy as before                          |                                                 |                         |              |         |
| No                                            | 44 (28.6%)                                      | 80 (25.1%)              | 124 (26.2%)  | 0.418   |
| Yes                                           | 110 (71.4%)                                     | 239 (74.9%)             | 349 (73.8%)  |         |
| Scoring GAD-7 Anxiety Severity                |                                                 |                         |              |         |
| 0-4; minimal anxiety                          | 95 (61.7%)                                      | 230 (72.1%)             | 325 (68.7%)  | 0.038   |
| 5-9; mild anxiety                             | 31 (20.1%)                                      | 57 (17.9%)              | 88 (18.6%)   |         |
| 10-14; moderate anxiety                       | 20 (13.0%)                                      | 19 (6.0%)               | 39 (8.2%)    |         |
| 15-21; severe anxiety                         | 8 (5.2%)                                        | 13 (4.1%)               | 21 (4.4%)    |         |
| Axiety, mild to severe GAD-7 score            |                                                 |                         |              |         |
| No                                            | 95 (61.7%)                                      | 230 (72.1%)             | 325 (68.7%)  | 0.022   |
| Yes                                           | 59 (38.3%)                                      | 89 (27.9%)              | 148 (31.3%)  |         |
| Depression severity measure                   |                                                 |                         |              |         |
| No or minimal                                 | 116 (75.3%)                                     | 249 (78.1%)             | 365 (77.2%)  | 0.339   |
| Mild                                          | 27 (17.5%)                                      | 44 (13.8%)              | 71 (15.0%)   |         |
| Moderate                                      | 8 (5.2%)                                        | 14 (4.4%)               | 22 (4.7%)    |         |
| Moderate to Severe                            | 1 (0.6%)                                        | 10 (3.1%)               | 11 (2.3%)    |         |
| Severe                                        | 2 (1.3%)                                        | 2 (0.6%)                | 4 (0.8%)     |         |
| Depression, PHQ-9 score                       |                                                 |                         |              |         |
| No                                            | 116 (75.3%)                                     | 249 (78.1%)             | 365 (77.2%)  | 0.507   |
| Yes                                           | 38 (24.7%)                                      | 70 (21.9%)              | 108 (22.8%)  |         |

Supplementary Table S2. Participant characteristics associated with immunization, comparing between those primed (with prior COVID-19 infection and having received one, or two doses) and those who received a third booster dose.

|                                                     | Third dose vs one or two previous doses |                         |                   | p-value | SMD   |
|-----------------------------------------------------|-----------------------------------------|-------------------------|-------------------|---------|-------|
|                                                     | Primed<br>142                           | Boosted 3rd dose<br>319 | Total<br>461      |         |       |
| Age in years                                        | 38.96 (12.19)                           | 43.35 (12.98)           | 42.00 (12.89)     | <0.001  | -0.35 |
| Age in groups in years                              |                                         |                         |                   |         |       |
| 18-24                                               | 25 (17.6%)                              | 42 (13.2%)              | 67 (14.5%)        | 0.009   | 0.32  |
| 25-49                                               | 85 (59.9%)                              | 159 (49.8%)             | 244 (52.9%)       |         |       |
| 50-64                                               | 32 (22.5%)                              | 118 (37.0%)             | 150 (32.5%)       |         |       |
| Male/Female                                         |                                         |                         |                   |         |       |
| Male                                                | 51 (35.9%)                              | 116 (36.4%)             | 167 (36.2%)       | 0.926   | <0.2  |
| Female                                              | 91 (64.1%)                              | 203 (63.6%)             | 294 (63.8%)       |         |       |
| Blood group                                         |                                         |                         |                   |         |       |
| O                                                   | 56 (39.7%)                              | 140 (44.0%)             | 196 (42.7%)       | 0.842   | <0.2  |
| A                                                   | 66 (46.8%)                              | 138 (43.4%)             | 204 (44.4%)       |         |       |
| B                                                   | 14 (9.9%)                               | 28 (8.8%)               | 42 (9.2%)         |         |       |
| AB                                                  | 5 (3.5%)                                | 12 (3.8%)               | 17 (3.7%)         |         |       |
| Occupational class                                  |                                         |                         |                   |         |       |
| High/Middle/Qualif                                  | 81 (58.3%)                              | 203 (66.1%)             | 284 (63.7%)       | 0.149   | 0.24  |
| Manual                                              | 44 (31.7%)                              | 70 (22.8%)              | 114 (25.6%)       |         |       |
| Low                                                 | 6 (4.3%)                                | 21 (6.8%)               | 27 (6.1%)         |         |       |
| Other                                               | 8 (5.8%)                                | 13 (4.2%)               | 21 (4.7%)         |         |       |
| Educational level                                   |                                         |                         |                   |         |       |
| No schooling compl                                  | 3 (2.1%)                                | 2 (0.6%)                | 5 (1.1%)          | 0.477   | <0.2  |
| Elementary School                                   | 15 (10.6%)                              | 39 (12.5%)              | 54 (11.9%)        |         |       |
| High School                                         | 59 (41.8%)                              | 122 (39.2%)             | 181 (40.0%)       |         |       |
| University                                          | 64 (45.4%)                              | 148 (47.6%)             | 212 (46.9%)       |         |       |
| Household members                                   |                                         |                         |                   |         |       |
| One or two                                          | 26 (18.4%)                              | 69 (21.9%)              | 95 (20.8%)        | 0.080   | 0.26  |
| Three                                               | 38 (27.0%)                              | 108 (34.3%)             | 146 (32.0%)       |         |       |
| Four                                                | 70 (49.6%)                              | 116 (36.8%)             | 186 (40.8%)       |         |       |
| More than four                                      | 7 (5.0%)                                | 22 (7.0%)               | 29 (6.4%)         |         |       |
| Level of social activity                            |                                         |                         |                   |         |       |
| Minimal                                             | 36 (25.4%)                              | 87 (27.4%)              | 123 (26.7%)       | 0.106   | 0.21  |
| Active                                              | 40 (28.2%)                              | 115 (36.2%)             | 155 (33.7%)       |         |       |
| High                                                | 66 (46.5%)                              | 116 (36.5%)             | 182 (39.6%)       |         |       |
| Activity in contact with people                     |                                         |                         |                   |         |       |
| No                                                  | 25 (17.7%)                              | 70 (22.1%)              | 95 (20.7%)        | 0.289   | <0.2  |
| Yes                                                 | 116 (82.3%)                             | 247 (77.9%)             | 363 (79.3%)       |         |       |
| Regular physical activity                           |                                         |                         |                   |         |       |
| No                                                  | 65 (45.8%)                              | 142 (44.5%)             | 207 (44.9%)       | 0.802   | <0.2  |
| Yes                                                 | 77 (54.2%)                              | 177 (55.5%)             | 254 (55.1%)       |         |       |
| Smoker                                              |                                         |                         |                   |         |       |
| No                                                  | 81 (57.9%)                              | 189 (59.6%)             | 270 (59.1%)       | 0.811   | <0.2  |
| Ex                                                  | 27 (19.3%)                              | 64 (20.2%)              | 91 (19.9%)        |         |       |
| Current                                             | 32 (22.9%)                              | 64 (20.2%)              | 96 (21.0%)        |         |       |
| Alcohol consumption                                 |                                         |                         |                   |         |       |
| None                                                | 41 (28.9%)                              | 78 (24.5%)              | 119 (25.8%)       | 0.317   | <0.2  |
| Light to moderate                                   | 101 (71.1%)                             | 241 (75.5%)             | 342 (74.2%)       |         |       |
| Underlying disorders                                |                                         |                         |                   |         |       |
| No                                                  | 103 (73.0%)                             | 210 (66.7%)             | 313 (68.6%)       | 0.175   | <0.2  |
| Yes                                                 | 38 (27.0%)                              | 105 (33.3%)             | 143 (31.4%)       |         |       |
| bmi                                                 | 25.75 (5.25)                            | 26.63 (4.98)            | 26.36 (5.07)      | 0.085   | <0.2  |
| Vit D blood levels                                  |                                         |                         |                   |         |       |
| <30 UI                                              | 78 (54.9%)                              | 198 (62.1%)             | 276 (59.9%)       | 0.149   | <0.2  |
| 30 UI and over                                      | 64 (45.1%)                              | 121 (37.9%)             | 185 (40.1%)       |         |       |
| Covid Hx none, one episode and reinfection          |                                         |                         |                   |         |       |
| One episode                                         | 97 (68.3%)                              | 253 (79.3%)             | 350 (75.9%)       | 0.011   | 0.25  |
| Reinfected                                          | 45 (31.7%)                              | 66 (20.7%)              | 111 (24.1%)       |         |       |
| Long COVID                                          |                                         |                         |                   |         |       |
| No                                                  | 90 (63.4%)                              | 243 (76.2%)             | 333 (72.2%)       | 0.005   | 0.28  |
| Yes                                                 | 52 (36.6%)                              | 76 (23.8%)              | 128 (27.8%)       |         |       |
| COVID cases by Predominant VOC circulation in Spain |                                         |                         |                   |         |       |
| Ancestral                                           | 94 (66.7%)                              | 211 (66.4%)             | 305 (66.4%)       | 0.014   | 0.30  |
| Alpha                                               | 11 (7.8%)                               | 6 (1.9%)                | 17 (3.7%)         |         |       |
| Delta                                               | 1 (0.7%)                                | 2 (0.6%)                | 3 (0.7%)          |         |       |
| Omicron                                             | 35 (24.8%)                              | 99 (31.1%)              | 134 (29.2%)       |         |       |
| log CD4+ Wuhan                                      | -6.58 (1.15)                            | -6.62 (1.10)            | -6.61 (1.11)      | 0.845   |       |
| log CD8+ Wuhan                                      | -6.33 (1.55)                            | -6.07 (1.40)            | -6.16 (1.45)      | 0.379   |       |
| log CD4+ BA.2                                       | -6.43 (1.13)                            | -6.58 (1.17)            | -6.53 (1.15)      | 0.504   |       |
| log CD8+ BA.2                                       | -6.41 (1.38)                            | -6.23 (1.40)            | -6.28 (1.39)      | 0.528   |       |
| Anti-S AU                                           | 1732.75 (1421.24)                       | 2216.07 (1627.33)       | 2067.20 (1581.06) | 0.002   |       |
| Anti-NAU                                            | 2.17 (2.76)                             | 2.47 (2.82)             | 2.38 (2.81)       | 0.301   |       |

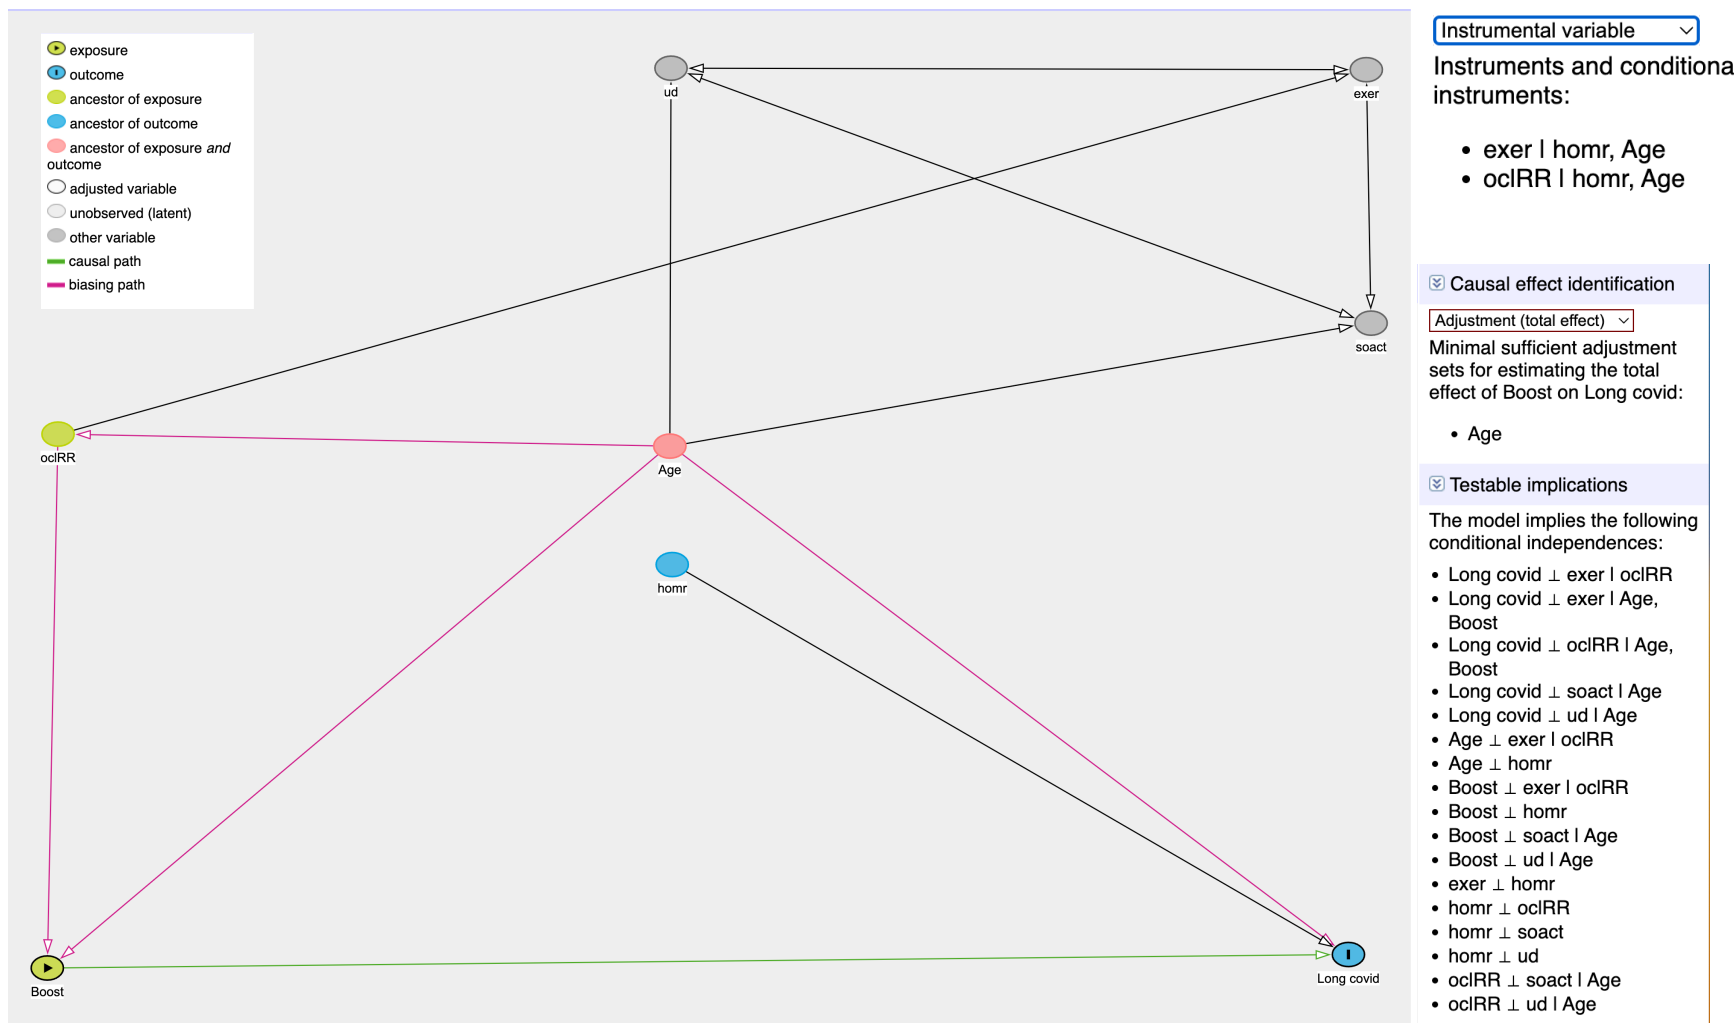

exer: regular physical activity. homr: Number of household members. oclRR: occupational class. ud: underlying chronic illnesses. soact: socila activity intensity. Boost: booster dose.

Supplementary Figure S1: DAG analysis.
